# Supplementary material for: Analysis of Drought Tolerance and Associated Traits in Upland Cotton at the Seedling Stage
Source: MDPI journal article supplement (doi:10.3390/ijms20163888), 2019-08-09
Supplement: s1 [file s1]

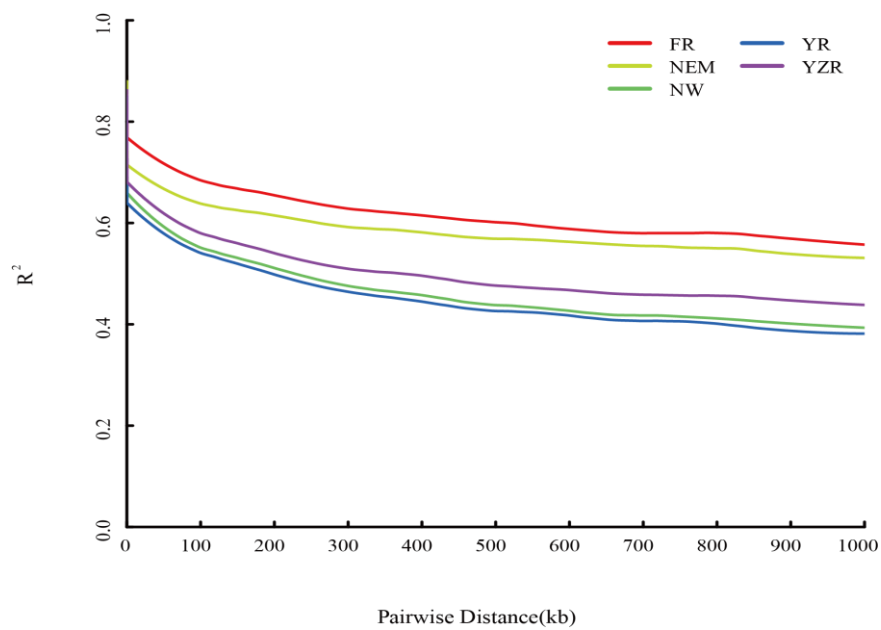

Figure S1. The mean LD decay rate was estimated as the squared correlation coefficient ( $R^2$ ) using all pairs of SNPs located within approximately 400 kb of physical distance in genomic regions in five subpopulations of 316 upland cotton accessions
